# Supplementary material for: Corinthian Currants Supplementation Restores Serum Polar Phenolic Compounds, Reduces IL-1beta, and Exerts Beneficial Effects on Gut Microbiota in the Streptozotocin-Induced Type-1 Diabetic Rat
Source: MDPI journal article supplement (doi:10.3390/metabo13030415), 2023-03-11
Supplement: s1 [file s1]

## Supplementary Material

**Table S1.** Polar phenolic content of Corinthian currant and rat chow.

| Polar Phenol<br>( $\mu\text{g}/100\text{g}$ ) | Rat Chow         | Corinthian currant |
|-----------------------------------------------|------------------|--------------------|
| <b>Flavonols</b>                              |                  |                    |
| Isorhamnetin                                  | $0.8 \pm 0.2$    | $27.8 \pm 1.5$     |
| Kaempferol                                    | $12.7 \pm 2.1$   | $32.4 \pm 4.8$     |
| Quercetin                                     | $4.4 \pm 1.2$    | $167.4 \pm 19.7$   |
| <b>Flavones</b>                               |                  |                    |
| Apigenin                                      | $31.8 \pm 3.5$   | tr                 |
| Chrysin                                       | n.d.             | $0.2 \pm 0.03$     |
| Luteolin                                      | $29.7 \pm 8.1$   | $1.10 \pm 0.1$     |
| <b>Flavanones</b>                             |                  |                    |
| Hesperetin                                    | $1.28 \pm 0.3$   | $0.51 \pm 0.11$    |
| Naringenin                                    | $2.6 \pm 0.9$    | $1.96 \pm 0.33$    |
| <b>Isoflavones</b>                            |                  |                    |
| Daidzein                                      | $137.1 \pm 13.7$ | tr                 |
| Formononetin                                  | $8.2 \pm 1.1$    | tr                 |
| Genistein                                     | $299.6 \pm 47.2$ | $0.11 \pm 0.1$     |
| <b>Benzoic acid derivatives</b>               |                  |                    |
| Vanillic acid                                 | $47.1 \pm 9.4$   | $241.5 \pm 30.2$   |
| Syringic acid                                 | $40.4 \pm 5.3$   | $102.6 \pm 14.9$   |
| <b>Cinnamic acid derivatives</b>              |                  |                    |
| trans-Cinnamic acid                           | n.d.             | $6.02 \pm 0.3$     |

**Table S2.** Two-way ANOVA parameters for main effects and associated interactions for the detected levels of polar phenolics in the serum of rats.

|                  |    | Flavonols                |        |               |        |                           |        |
|------------------|----|--------------------------|--------|---------------|--------|---------------------------|--------|
|                  | df | Isorhamnetin             |        | Kaempferol    |        | Quercetin                 |        |
|                  |    | F                        | P      | F             | P      | F                         | P      |
| Corrected model  | 3  | 95.69                    | <0.001 | 49.34         | <0.001 | 42.06                     | <0.001 |
| Intercept        | 1  | 139.55                   | <0.001 | 335.96        | <0.001 | 58.17                     | <0.001 |
| Treatment        | 1  | 102.53                   | <0.001 | 9.63          | 0.005  | 44.85                     | <0.001 |
| Food             | 1  | 108.41                   | <0.001 | 131.64        | <0.001 | 46.57                     | <0.001 |
| Treatment x Food | 1  | 76.12                    | <0.001 | 6.75          | 0.016  | 34.75                     | <0.001 |
|                  |    | Flavones                 |        |               |        |                           |        |
|                  | df | Apigenin                 |        | Chrysin       |        | Luteolin                  |        |
|                  |    | F                        | P      | F             | P      | F                         | P      |
| Corrected model  | 3  | 102.68                   | <0.001 | 113.80        | <0.001 | 27.72                     | <0.001 |
| Intercept        | 1  | 460.93                   | <0.001 | 188.24        | <0.001 | 84.45                     | <0.001 |
| Treatment        | 1  | 34.37                    | <0.001 | 76.58         | <0.001 | 5.33                      | 0.030  |
| Food             | 1  | 272.43                   | <0.001 | 188.24        | <0.001 | 74.18                     | <0.001 |
| Treatment x Food | 1  | 1.26                     | 0.273  | 76.58         | <0.001 | 3.65                      | 0.068  |
|                  |    | Flavanones               |        |               |        |                           |        |
|                  | df | Hesperetin               |        | Naringenin    |        |                           |        |
|                  |    | F                        | P      | F             | P      |                           |        |
| Corrected model  | 3  | 50.10                    | <0.001 | 27.06         | <0.001 |                           |        |
| Intercept        | 1  | 297.40                   | <0.001 | 244.81        | <0.001 |                           |        |
| Treatment        | 1  | 3.78                     | 0.064  | 0.83          | 0.370  |                           |        |
| Food             | 1  | 145.89                   | <0.001 | 78.78         | <0.001 |                           |        |
| Treatment x Food | 1  | 0.64                     | 0.431  | 1.57          | 0.223  |                           |        |
|                  |    | Isoflavones              |        |               |        |                           |        |
|                  | df | Daidzein                 |        | Formononetin  |        | Genistein                 |        |
|                  |    | F                        | P      | F             | P      | F                         | P      |
| Corrected model  | 3  | 47.80                    | <0.001 | 42.53         | <0.001 | 35.24                     | <0.001 |
| Intercept        | 1  | 266.22                   | <0.001 | 247.94        | <0.001 | 211.47                    | <0.001 |
| Treatment        | 1  | 5.30                     | 0.030  | 20.29         | <0.001 | 4.07                      | 0.055  |
| Food             | 1  | 126.72                   | <0.001 | 107.28        | <0.001 | 98.02                     | <0.001 |
| Treatment x Food | 1  | 11.36                    | 0.003  | 0.03          | 0.854  | 3.63                      | 0.069  |
|                  |    | Benzoic acid derivatives |        |               |        | Cinnamic acid derivatives |        |
|                  | df | Vanillic acid            |        | Syringic acid |        | trans-cinnamic acid       |        |
|                  |    | F                        | P      | F             | P      | F                         | P      |
| Corrected model  | 3  | 192.66                   | <0.001 | 34.42         | <0.001 | 8.17                      | 0.001  |
| Intercept        | 1  | 1627.82                  | <0.001 | 211.46        | <0.001 | 200.75                    | <0.001 |
| Treatment        | 1  | 183.13                   | <0.001 | 24.50         | <0.001 | 1.74                      | 0.199  |
| Food             | 1  | 84.66                    | <0.001 | 3.27          | 0.083  | 19.01                     | <0.001 |
| Treatment x Food | 1  | 310.20                   | <0.001 | 75.49         | <0.001 | 3.76                      | 0.064  |

**Table S3.** Nutrients' composition and energy content of rat chow and Corinthian currants provided to the animals.

| Nutrients                | Rat Chow      | Corinthian currants |
|--------------------------|---------------|---------------------|
| Macronutrients (g/ 100g) |               |                     |
| Proteins                 | 18.5          | 2.5                 |
| Fat                      | 3.0           | < 0.4               |
| Carbohydrates            | 46.3          | 77.5                |
| Dietary fiber            | 6.0           | 6.7                 |
| Energy (Kcal)            | 387.6         | 294                 |
| Minerals (mg/ 100g)      |               |                     |
| Ca                       | . 101% U.M.   | 10                  |
| P                        | 0.57 % U.M.   | 181                 |
| Na                       | 0.3 % U.M.    | -                   |
| Cl                       | 0.26 % U.M.   | -                   |
| K                        | 0.61 % U.M.   | 710                 |
| Mg                       | 0.17 % U.M.   | 30                  |
| Fe                       | 33.2          | 4                   |
| Cu                       | 1.98          | -                   |
| Mn                       | 7.37          | -                   |
| Zn                       | 8.71          | 0.6                 |
| Co                       | 0.056         | -                   |
| I                        | 0.063         | -                   |
| Se                       | 0.013         | -                   |
| Vitamins (mg/100g)       |               |                     |
| A                        | 15400 (IU/kg) | -                   |
| D3                       | 1340 (IU/kg)  | -                   |
| E                        | 6.3           | -                   |
| B1 (thiamine)            | 1.66          | 0.14                |
| B2 (riboflavin)          | .813          | 0.11                |
| B6 (pyridoxine)          | .883          | 0.19                |
| B12 (cyanocobalamin)     | 0.003         | -                   |
| K (menadione)            | 0.311         | -                   |
| Folic acid               | .229          | 6.6                 |
| Nicotinic acid           | 8.51          | 1.01                |
| Pantothenic acid         | 2.01          | n.d.                |
| Choline                  | 177.1         | -                   |
| Biotin                   | .035          | n.d.                |

U.M.: measurement unit, n.d.: not detected.
